# Supplementary material
Source: HighWire-hosted journal article supplement (https://jnm.snmjournals.org/highwire/filestream/94280/field_highwire_adjunct_files/0/89177_Supplemental_Data.pdf)
Supplement: 89177_Supplemental_Data.pdf [file 89177_Supplemental_Data.pdf]

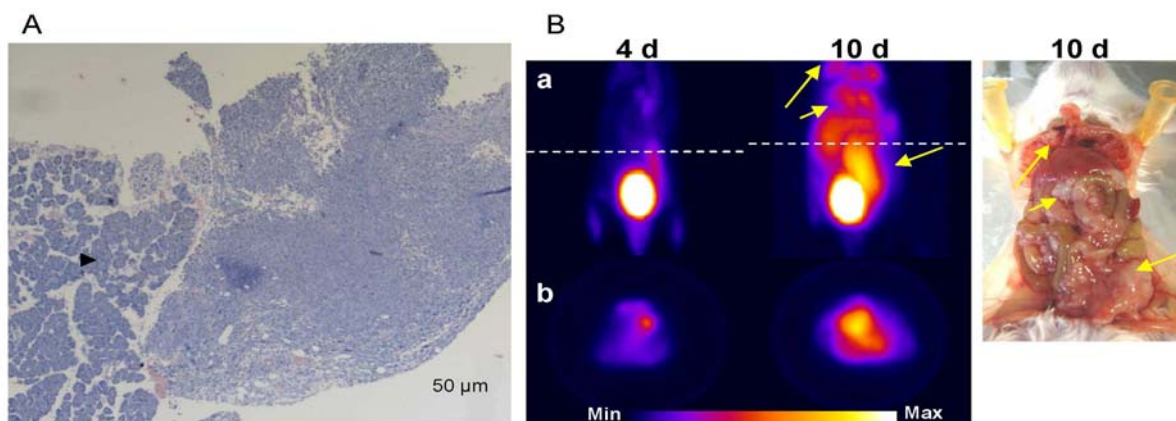

**SUPPLEMENTAL FIGURE 1** Set up of peritoneal carcinomatosis experimental model. (A) Representative picture of haematoxylin and eosin staining of peritoneal TS/A adenocarcinoma lesions: neoplastic three-dimensional lesions grew as independent masses attached to peritoneal linings or to abdominal organs like pancreas (arrowhead). (B) [ $^{18}\text{F}$ ]-FDG-PET scans of the abdomen of a representative mouse followed in the model setting study. Coronal view (a) of the image reconstruction and axial slices (b) taken at the level of tumor location (dashed white line). Right panel shows a picture of the same mouse at the moment of necropsy. Tumor masses are indicated by yellow arrows.

Schematic representation of the study design.

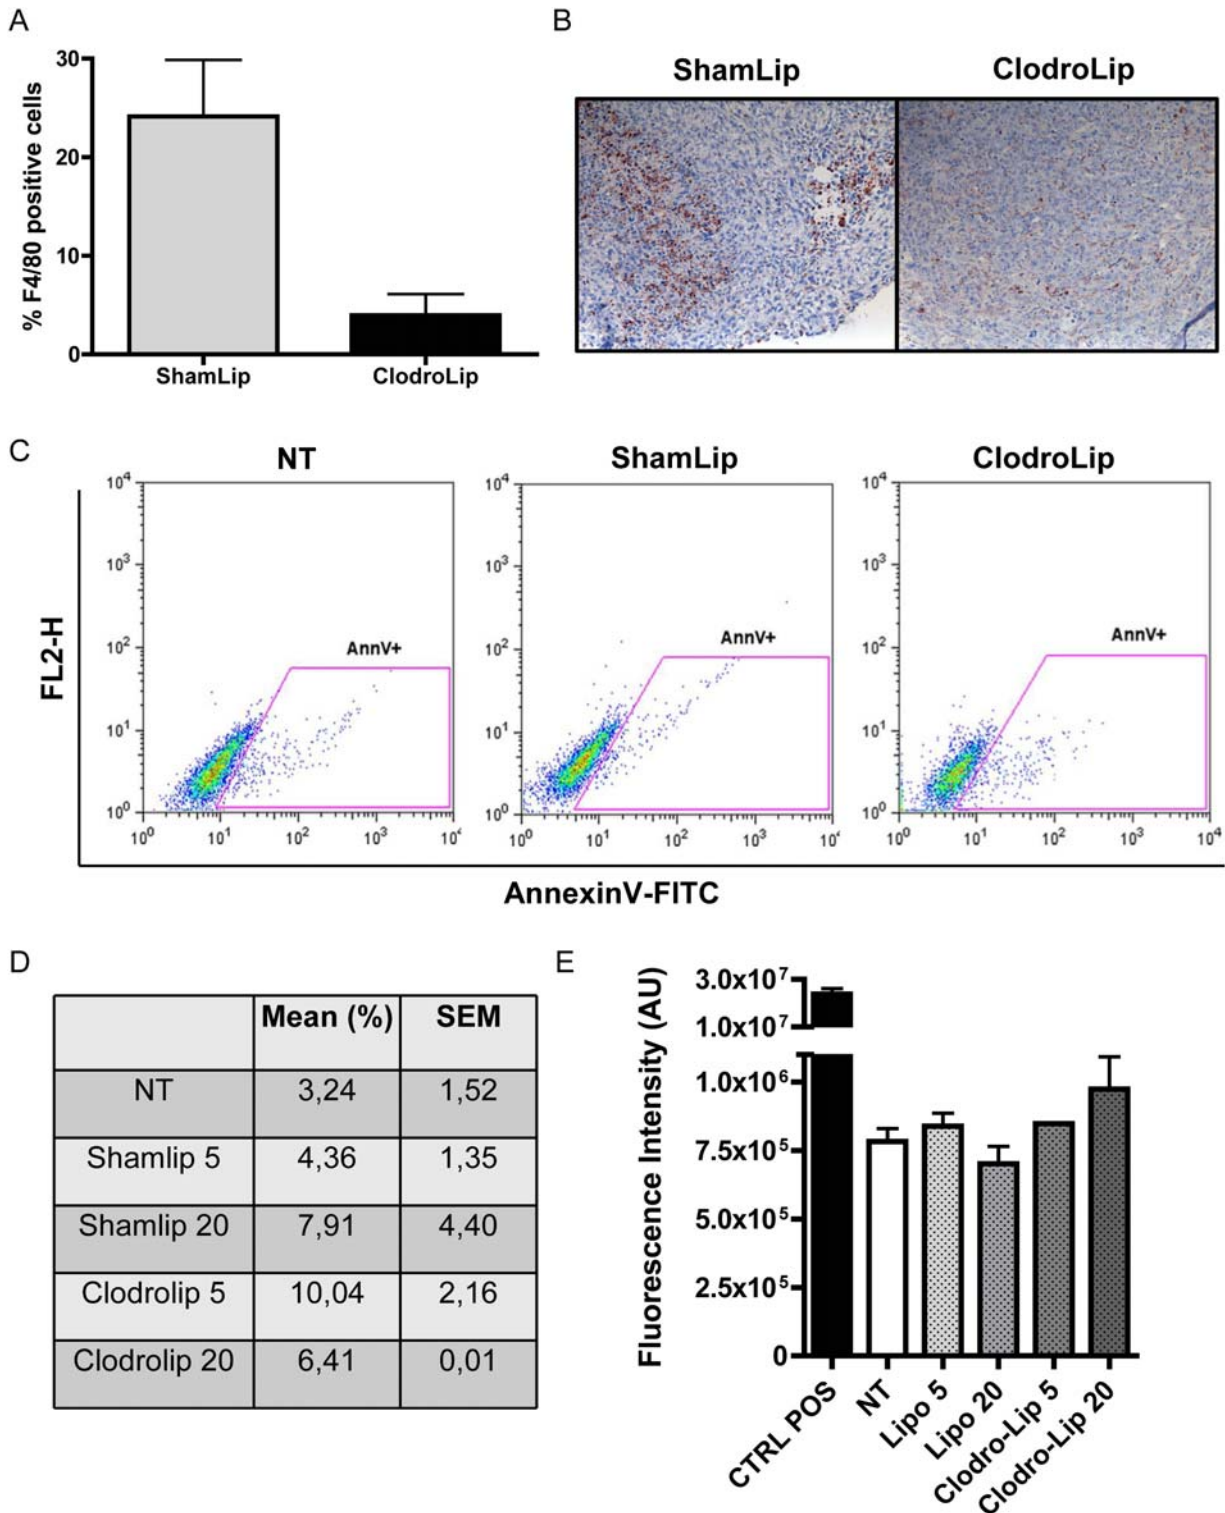

**SUPPLEMENTAL FIGURE 2** Treatment with ClodroLip efficiently depletes macrophages and does not affect TS/A adenocarcinoma cells viability *in vitro*. (A) Macrophages were analyzed by flow cytometry in the peritoneal liquid of TS/A adenocarcinoma bearing animals treated with Shamlip or Clodrolip. Values are calculated as % of F4/80, a pan-

macrophages surface marker, positive cells in total leukocytes. Error bars represent SD, calculated on 13 animals from 4 independent experiments. (B) Representative pictures of immunohistochemical staining of TS/A adenocarcinoma peritoneal lesions (20 X magnification) for the CD68 intracellular pan-macrophage marker. Staining was performed on at least 8 randomly selected areas of tumor, in triplicate. (C) Representative dot plots of the staining of *in-vitro* adenocarcinoma TS/A cells with AnnexinV, that identifies phosphatidylserine exposing cells. Cells were incubated for 16 hours in vitro with nominal concentration of 200  $\mu\text{g}/\mu\text{l}$  of liposome-encapsulated clodronate (Clodrolip) or correspondent volumes of PBS containing liposomes (Shamlip) or medium (NT) as controls. (D) Mean % of apoptotic cells, calculated as % of Annexin V + TS/A cells, in the conditions where nominal concentrations of clodronate are indicated as 5 = 25  $\mu\text{g}/\mu\text{l}$ , 20 = 100  $\mu\text{g}/\mu\text{l}$ ; data are obtained from 2 replicates, 2 independent experiments. (E) LDH concentration in the supernatant of Clodrolip vs Shamlip treated adenocarcinoma TS/A cells after 16 hours, in the conditions where nominal concentrations are indicated as 5 = 25  $\mu\text{g}/\mu\text{l}$ , 20 = 100  $\mu\text{g}/\mu\text{l}$ ; error bars indicate SD. LDH = Lactate dehydrogenase; NT = non treated; SD = Standard Deviation; SEM = Standard Error Mean.

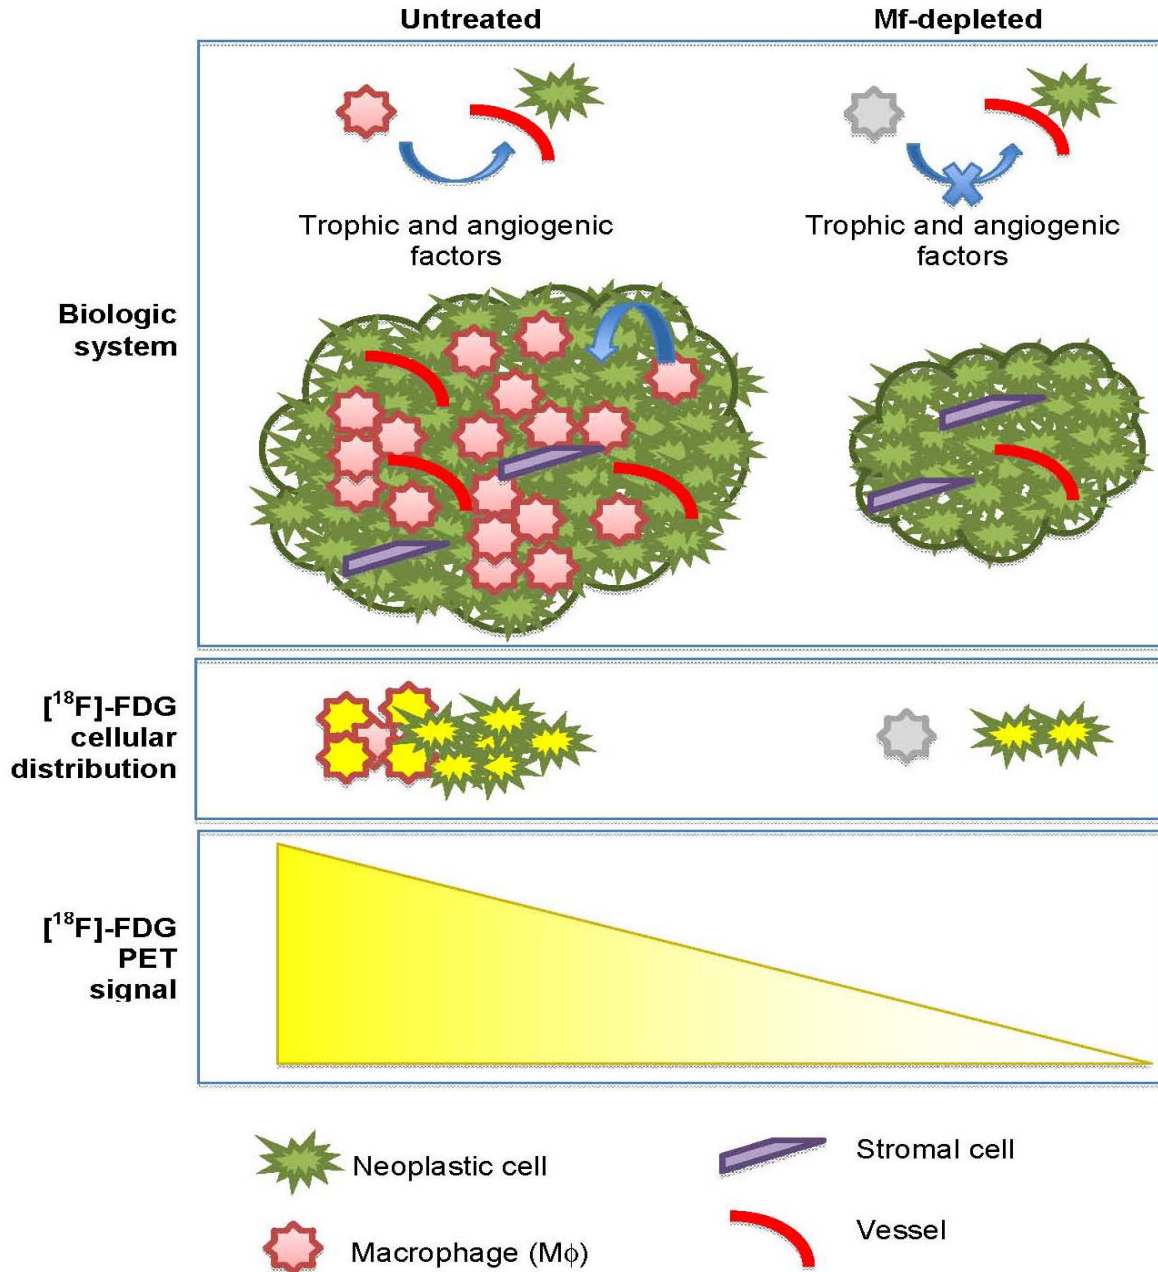

**SUPPLEMENTAL FIGURE 3** Schematic model of the role of neoplastic cells and TAMs in [<sup>18</sup>F]-FDG-PET signal generation.
